# Supplementary material
Source: MDPI journal article supplement (https://www.mdpi.com/2073-4433/15/4/504)
Supplement: s1 [file s1]

Questions to be asked during Dec 8th webinar:

- Target audience—LTC maintenance staff
1. What is your role in long-term care (LTC)?
    - a. Owner;
    - b. Administrator;
    - c. Nurse;
    - d. Infection preventionist;
    - e. Maintenance;
    - f. Something else within LTC;
    - g. I don't work in the LTC setting.
  2. What kind of LTC facility do you work at?
    - a. Skilled nursing;
    - b. Assisted living;
    - c. Other.
  3. How long have you been in your role?
    - a. Less than a year;
    - b. One to two years;
    - c. Three to four years;
    - d. Greater than four years.
  4. Where did you gain your current knowledge related to heating, ventilation, and air conditioning (HVAC)
    - a. All on-the-job training;
    - b. On-the-job training plus trade school;
    - c. On-the-job training plus some college;
    - d. On-the-job training plus college degree;
    - e. I do not consider myself knowledgeable about HVAC systems.
  5. Classify your current skill level with HVAC maintenance and operation tasks such as troubleshooting building pressure issues, identifying causes of poor ventilation, and ensuring air filters are installed appropriately to minimize leakage.
    - a. Not confident at all;
    - b. Slightly confident;
    - c. Fairly confident;
    - d. Mostly confident;
    - e. Completely confident.
  6. Will the information presented today help you perform your job more effectively?
    - a. Strongly agree;
    - b. Moderately agree;

- c. Neither agree or disagree;
  - d. Moderately disagree;
  - e. Strongly disagree.
7. Is this webinar likely to change the way you prioritize indoor air quality during wildfire season?
- a. Strongly agree;
  - b. Moderately agree;
  - c. Neither agree or disagree;
  - d. Moderately disagree;
  - e. Strongly disagree.
8. In your opinion, what are the major barriers to making changes that would enhance indoor air quality during smoke events? (select all that apply)
- a. Time;
  - b. Money;
  - c. Man-power;
  - d. Not a priority;
  - e. Management is not engaged;
  - f. Lack of expertise or knowledge;
  - g. NA/other.
9. How likely is your LTC facility to establish and implement a smoke preparedness plan?
- a. Not likely at all;
  - b. Slightly likely;
  - c. Fairly likely;
  - d. Most likely;
  - e. Very likely.
10. What is one thing you plan to change to improve indoor air quality in your facility?  
(Select all that apply)
- a. Make sure my building pressure is good and begin fixing if needed;
  - b. Make sure my filters are sealed next time they are changed and repair or modify my filter racks if the filters aren't sealed well;
  - c. Install Merv 13 Air Filters during smoke season;
  - d. Begin developing a smoke preparedness plan;
  - e. Create a HVAC zone map;
  - f. Idaho power energy audit by Idaho Design Lab;
  - g. Hire an Engineer to do an energy audit;
  - h. Call a local contractor for a HVAC "health check";
  - i. Order stand-alone air purification units;
  - j. Order indoor air sensors.

Questions asked during each interview session:

1. How do you feel your knowledge regarding the importance of indoor air quality changed after the workshop?
2. When asked if the information presented during the workshop would change the way indoor air quality was prioritized during wildfire season, about half of the participants strongly agreed while the other half moderately agreed or were neutral. How would you respond today?
3. During the workshop, we asked you to consider at least one goal to improve indoor air quality at your facility; did you achieve this goal?
4. What were some of the challenges you came across while implementing what you learned at the workshop?
5. How could the workshop be improved, or is there anything else you would like to add?
